# Supplementary material
Source: MDPI journal article supplement (https://www.mdpi.com/2075-5309/14/5/1379)
Supplement: s1 [file s1]

Table S1: Theoretical Framework for Measuring Architectural Identity

| Serial | Factors                                   | Sub factors                       | Possible values                                         |
|--------|-------------------------------------------|-----------------------------------|---------------------------------------------------------|
| 1      | <b>Formal Appearance-physical setting</b> | Simplicity of building proportion | Simple proportion between the parts                     |
|        |                                           |                                   | Golden section                                          |
|        |                                           |                                   | Complicated proportion                                  |
|        |                                           | Symbolic Features                 | Low symbolic rate                                       |
|        |                                           |                                   | Medium symbolic rate                                    |
|        |                                           |                                   | High symbolic rate                                      |
|        |                                           | Human Scale                       | Smaller than human scale                                |
|        |                                           |                                   | unity with human scale                                  |
|        |                                           |                                   | Larger than human scale                                 |
|        |                                           | Mass regularity                   | Irregular mass                                          |
|        |                                           |                                   | Neutral mass                                            |
|        |                                           |                                   | Regular mass                                            |
|        |                                           | Solid-to-void relationship        | Solid elements are larger than Void parts               |
|        |                                           |                                   | 1:1 (equal ) relationship                               |
|        |                                           |                                   | Solid elements are smaller than Void parts              |
|        |                                           | Vernacular Architectural Details  | Cultural context                                        |
|        |                                           |                                   | Historical context                                      |
|        |                                           |                                   | Environmental context                                   |
|        |                                           | Materiality                       | Using Traditional materials                             |
|        |                                           |                                   | Using Modern materials                                  |
|        |                                           |                                   | Mixing traditional with modern materials                |
| 2      | <b>Meaning Dimensions</b>                 | Conceptual Meaning                | Conceptual                                              |
|        |                                           | Associative meaning               | Connotative meaning                                     |
|        |                                           |                                   | Social meaning                                          |
|        |                                           |                                   | Affective meaning                                       |
|        |                                           |                                   | Reflective meaning                                      |
|        |                                           |                                   | Collocative meaning                                     |
|        |                                           |                                   | Thematic meaning                                        |
| 3      | <b>Originality</b>                        | Essence                           | Intellectual changes and new philosophical propositions |
|        |                                           |                                   | Human needs for change and Developments                 |
|        |                                           | Form                              | Scientific advancement                                  |
|        |                                           |                                   | Technological evolutions                                |
|        |                                           | Function                          | Convoy of developments in other fields of knowledge     |
| 4      | <b>Architectural Language</b>             | Building Element Codes            | Vernacular code                                         |
|        |                                           |                                   | Modern code                                             |
|        |                                           |                                   | A shared code                                           |
|        |                                           | Symbolic behavior                 | Sign                                                    |
|        |                                           |                                   | Symbol                                                  |
|        |                                           |                                   | index                                                   |
|        |                                           | Imitation Models                  | Western Model                                           |
|        |                                           |                                   | Local Model                                             |
|        |                                           |                                   | Combination Model                                       |
|        |                                           | Cultural Boundaries               | Local( Vernacular)                                      |

|   |                      |                                                     |                                                    |
|---|----------------------|-----------------------------------------------------|----------------------------------------------------|
|   |                      |                                                     | Regional Boundaries                                |
|   |                      |                                                     | International Boundaries                           |
| 5 | Building regulations | Health and Environmental Protection                 | Ratio of open spaces in front facade               |
|   |                      |                                                     | Mass location within the plot of land              |
|   |                      | Consistency and Quality Assurance                   | Building height limitation                         |
|   |                      |                                                     | Building set back regulation                       |
|   |                      | Urban Planning and Development Control              | Façade articulation and colors selection           |
|   |                      |                                                     | Regulation of Base relationship to the ground line |
|   |                      | Safety and Structural Integrity                     | Fire regulation of façade materials                |
|   |                      |                                                     | Isolation regulation of façade materials           |
| 6 | Mental images        | Building Element Codes and Symbolic behavior        | Vernacular code                                    |
|   |                      |                                                     | Modern code                                        |
|   |                      |                                                     | Mixed code                                         |
|   |                      | Imitation Models                                    | Western Model                                      |
|   |                      |                                                     | Local Model                                        |
|   |                      |                                                     | Combination Model                                  |
|   |                      | Cultural Boundaries                                 | Local Boundaries                                   |
|   |                      |                                                     | Regional Boundaries                                |
|   |                      |                                                     | International Boundaries                           |
| 7 | Site context         | The relation between site context and building Form | The site context dominates the Form                |
|   |                      |                                                     | Partial integration between the form and context   |
|   |                      |                                                     | Keeping the Shape of the Site                      |
|   |                      | Site context strategies                             | Response to the Topography                         |
|   |                      |                                                     | Response to building Form                          |
|   |                      |                                                     | Harmony between Site & Form                        |
